# Supplementary material
Source: PubMed Central journal article supplement (PMC3448102)
Supplement: Supp_Fig1.pdf [file Supp_Fig1.pdf]

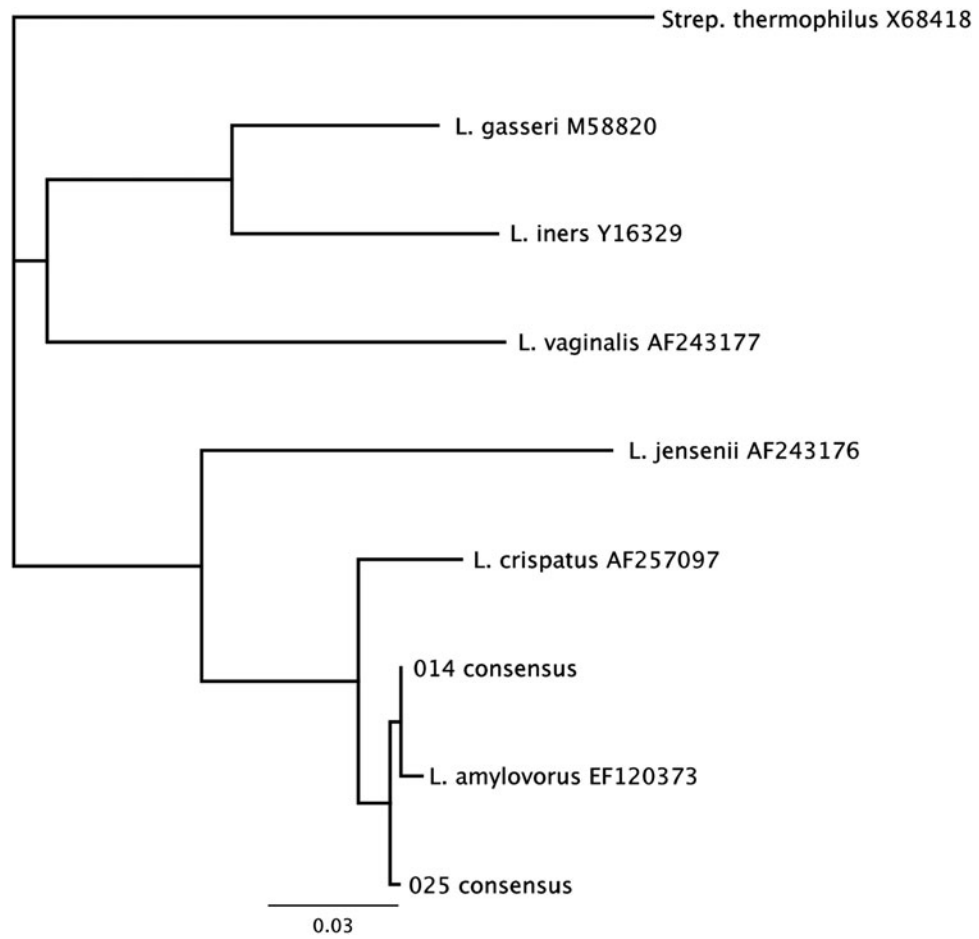

**SUPPLEMENTARY FIG. S1.** Phylogenetic tree of *Lactobacillus* sequences found in macaques 014 and 025. NCBI accession numbers of reference sequences are shown.
