# Supplementary material
Source: PubMed Central journal article supplement (PMC3448102)
Supplement: Supp_Fig2.pdf [file Supp_Fig2.pdf]

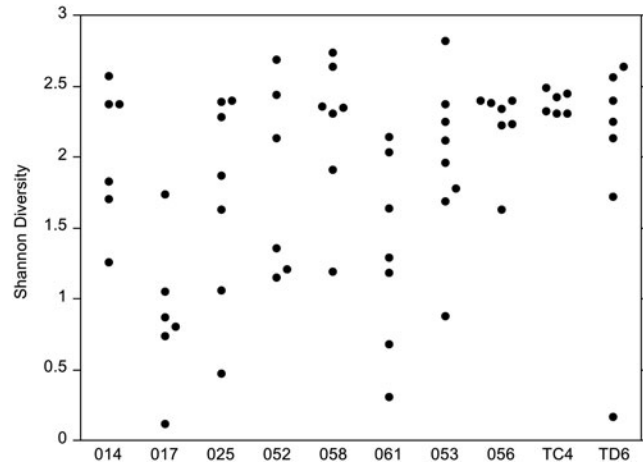

**SUPPLEMENTARY FIG. S2.** Shannon diversity scores for lower genital tract bacterial microbiota in macaques. Each time point is represented by one point.
