# Supplementary material
Source: PubMed Central journal article supplement (PMC3448102)
Supplement: Supp_Table1.pdf [file Supp_Table1.pdf]

SUPPLEMENTARY TABLES 1. NUMBERS OF *SNEATHIA* IN MACAQUE GENITAL SAMPLES

| Week | <i>Sneathia</i> levels ( $\log_{10}$ ) |      |      |      |      |     |      |      |      |      |
|------|----------------------------------------|------|------|------|------|-----|------|------|------|------|
|      | 014                                    | 017  | 025  | 052  | 058  | 061 | 053  | 056  | TC4  | TD6  |
| 4    | <3                                     | 8.33 | 6.60 | <3   | 6.23 | <3  | 6.00 | 6.79 | 7.05 | 4.50 |
| 5    | <3                                     |      |      | 6.85 |      | <3  | 6.49 | 6.94 |      |      |
| 7    |                                        | 7.96 | 5.97 |      | 7.21 |     | 5.90 | 7.57 | 6.63 | 5.70 |
| 8    | <3                                     | 7.98 | 7.67 | 6.44 | 5.77 | <3  | 5.79 | 6.76 | 7.28 | 5.96 |
| 9    | <3                                     | 7.51 | 6.12 | 7.98 | 7.09 | <3  | 6.95 | 6.29 | 6.59 | <3   |
| 10   |                                        |      | 5.73 |      | 5.93 | <3  | 5.78 |      |      | 6.57 |
| 11   | <3                                     | 8.17 | 6.26 | 7.28 | 6.78 | <3  | 5.64 | 4.77 | 6.13 | 6.75 |
| 12   | <3                                     | 7.55 | 6.76 | 4.83 | 6.23 | <3  | 6.86 | 7.32 | 6.42 | 6.15 |

A blank indicates that a sample was not obtained.
